# Supplementary material for: Antibiotic-resistant characteristics and horizontal gene transfer ability analysis of extended-spectrum β-lactamase-producing Escherichia coli isolated from giant pandas
Source: Front Vet Sci. 2024 Jul 26;11:1394814. doi: 10.3389/fvets.2024.1394814 (PMC11310934; doi:10.3389/fvets.2024.1394814)
Supplement: Supplementary file 8 [file Table_1.XLSX]

## Sheet: Sheet1
Table S1 PCR primer and conditions used in this study.
Antibiotic resistance genes	Antimicrobial Category	Genes		Primers Sequence (5′→3′)	Fragment Length (bp)	Initial denaturation	Denaturation	Annealing	Extension	Final elongation
	β-lactams	blaCTX-M	blaCTX-M-1	F: AAAAATCACTGCGCCAGTTC	415	94 °C for 30 s	94 °C for 30 s, 30cycles	57 °C for 30 s	72 °C for 1 min	72 °C for 2 min
				R: AGCTTATTCATCGCCACGTT
			blaCTX-M-2	F: CGACGCTACCCCTGCTATT	552			57 °C for 30 s
				R: CCAGCGTCAGATTTTTCAGG
			blaCTX-M-9	F: TCAAGCCTGCCGATCTGGT	561			60 °C for 30 s
				R: TGATTCTCGCCGCTGAAG
			blaCTX-M-8/25	F: AACRCRCAGACGCTCTAC	326			60 °C for 30 s
				R: TCGAGCCGGAASGTGTYAT
		blaTEM		F: GGGGATGAGTATTCAACATTTCC	861			53 °C for 30 s
				R: GGGCAGTTACCAATGCTTAATCA
		blaSHV		F: AGCCGCTTGAGCAAATTAAAC	635			53 °C for 30 s
				R: ATCCCGCAGATAAATCACCAC
	Tetracyclines	tetA		F: GCTACATCCTGCTTGCCTTC	210			61 °C for 30 s
				R: CATAGATCGCCGTGAAGAGG
		tetC		F: CTTGAGAGCCTTCAACCCAG	418			61 °C for 30 s
				R: ATGGTCGTCATCTACCTGAG
	Sulfonamide	sul1		F: GTGACGGTGTTCCGCATTCT	779			50 °C for 30 s
				R: GGTAACATTTTCGGTTCCTG
		sul2		F: CATCATTTTCGGCATCGTC	793			50 °C for 30 s
				R: TCTTGCGGTTTCTTTCAGC
		sul3		F: AGATGTGATTGATTTGGGAGC	443			50 °C for 30 s
				R: TAGTTGTTTCTGGATTAGAGCT
	Quinolones	qnrS		F: GCAAGTTCATTGAACAGGGT	428			63 °C for 30 s
				R: TCTAAACCGTCGAGTTCGGCG
		qnrA		F: CCAGGATTTGAGTGACAGC	592			63 °C for 30 s
				R: TCCCAAGGGTTCCAGCA
		oqxAB		F: GATCAGTCAGTGGGATAGTTT	671			56 °C for 30 s
				R: TACTCGGCGTTAACTGATTA
	Amide alcohols	flor		F: GGCTTTCGTCATTGCGTCTC	650			61 °C for 30 s
				R: ATCGGTAGGATGAAGGTGAGA
		cmlA		F: TGCCAGCAGTGCCGTTTAT	900			63 °C for 30 s
				R: CACCGCCCAAGCAGAAGTA
	Aminoglycosides	armA		F: ATTCTGCCTATCCTAATTGG	315			55 °C for 30 s
				R: ACCTATACTTTATCGTCGTC
		rmtB		F: GCTTTCTGCGGGCGATGTAA	173			55 °C for 30 s
				R: ATGCAATGCCGCGCTCGTAT
Virulence-associated genes	Adhesion related genes	tsh		F: GGGAAATGACCTGAATGCTGG	420			60 °C for 30 s
				R: CCGCTCATCAGTCAGTACCAC
		eaeA		F: GGAACGGCAGAGGTTAATCTGCAG	346			58 °C for 30 s
				R: GGCGCTCATCATAGTCTTTC
		papA		F: GGAACGAACGCAGAAACG	297			55 °C for 30 s
				R: CGCAATGGGCGAATACTT
		fimC		F: GGAAATAACATTCTGCTTGC	288			55 °C for 30 s
				R: TTTGTTGCATCAAGAATACG
	Hemolysin related genes	hlyA		F: CACACGGAGCTTATAATATTCTGTCA	321			58 °C for 30 s
				R: AA TGTTATCCCATTGACATCATTTGACT
		hlyF		F: GGCGATTTAGGCATTCCGATACTC	599			60 °C for 30 s
				R: ACGGGGTCGCTAGTTAAGGAG
	Invasion and toxin related genes	elt		F: GGCGTTACTATCCTCTCTAT	272			55 °C for 30 s
				R: TGGTCTCGGTCAGATATGT
		estA		F: CAACTGAATCACTTGACTCTT	158			58 °C for 30 s
				R: TTAATAACATCCAGCACAGG
		estB		F: TGCCTATGCATCTACACAAT	113			58 °C for 30 s
				R: CTCCAGCAGTACCATCTCTA
		astA		F: TGCCATCAACACAGTATATCCG	102			57 °C for 30 s
				R: ACGGCTTGTAGTCCTTCCAT
		vat		F: TCCATGCTTCAACGTCTCAGAG	939			55 °C for 30 s
				R: CTGTTGTCAGTGTCGTGAACG
		ipaH		F: TGAGAGCTGTGAGGACCGT	383			55 °C for 30 s
				R: CATGCCATGGTCCCCAGAGG
	Iron transport related genes	fyuA		F: GCTTTATCCTCTGGCCTT	947			55 °C for 30 s
				R: GGCATATTGACGATTAAC
		iroN		F: AAGTCAAAGCAGGGGTTGCCCG	667			63 °C for 30 s
				R: GACGCCGACATTAAGACGCAG
		irp2		F: AAGGATTCGCTGTTACCGGAC	267			54 °C for 30 s
				R: TCGTCGGGCAGCGTTTCTTCT
		iucD		F: CAGGGTGGTAAATAAGGTTG	196			55 °C for 30 s
				R: CAGTATCCCGTGAAGAGTTT
		sitA		F: AGGGGGCACAACTGATTCTCG	608			62 °C for 30 s
				R: TACCGGGCCGTTTTCTGTGC
	Antiserum survival factor	cvaC		F: TCCAAGCGGACCCCTTATAG	598			55 °C for 30 s
				R: CGCAGCATAGTTCCATGCT
		ompT		F: ATCTAGCCGAAGAAGGAGGC	559			60 °C for 30 s
				R: CCCGGGTCATAGTGTTCATC
		iss		F: CAGCAACCCGAACCACTTGATG	323			63 °C for 30 s
				R: AGCATTGCCAGAGCGGCAGAA
Mobile genetic elements		traA		F: AAGTGTTCAGGGTGCTTCTGCGC	272			62 °C for 30 s
				R: GTCATGTACATGATGACCATTT
		trbC		F: CGGYATWCCGSCSACRCTGCG	255			65 °C for 30 s
				R: GCCACCTGYSBGCAGTCMCC
		tnpU		F: CCAACTGATGGCGGTGCCTT	403			60 °C for 30 s
				R: GGTATGGTGGCTTTCGC
		tnpA/Tn21		F: ATGCCACGTCGTTCCATCCTGTCC	300			65 °C for 30 s
				R: CGGGTCTGCTCCCGCTGGCC
		merA		F: GACCAGCCGCAGTTCGTCTA	462			60 °C for 30 s
				R: GCAGCASGAAAGCTGCTTCA
		tnp513		F: ATGTCGCTGGCAAGGAACGC	240			62 °C for 30 s
				R: GGGTTCGCTGCGAGGGATTGT
		ISCR1		F: ATGTCGCTGGCAAGGAACGC	240			62 °C for 30 s
				R: GGGTTCGCTGCGAGGATTGT
		ISCR3/14		F: GGACTTCATTGCACGGATCGAAGC	339			65 °C for 30 s
				R: TGCACGATGCCCAGCACCGGGCCA
		IS1133		F: AGTACAAAAGCTGTGAGATTTCAG	622			56 °C for 30 s
				R: GATATTCATGAGCGCAATATTGGC
		ISEcp1		F: CTTCATTGGCATTGATAAGTTAG	299			55 °C for 30 s
				R: TGTAGCATCGGTTTCCCAGTTTC
		IS26		F: ATGAAGCCATTCAAAGGCCGGCAT	387			62 °C for 30 s
				R: TATGCAGCTTTGCTGTTACGACGG
		ISaba1		F: AATGATTGGTGACAATGAAG	372			55 °C for 30 s
				R: ATGCAGCGCTTCTTTGCAGG
		IS903		F: GCAATACGCACG CTTTCAGGC	240			62 °C for 30 s
				R: ACTGCACGGTTACGGTCTGCA
		intI1		F: ACGAGCGCAAGGTTTCGGT	525			56 °C for 30 s
				R: GAAAGGTCTGGTCATACATG
		intI2		F: CACGGATATGCGACAAAAAGGT	789			56 °C for 30 s
				R: GTAGCAAACGACTGACGACAAAAAGGT
		intI3		F: GCCTCCGGCAGCGACTTTCAG	433			65 °C for 30 s
				R: GATGCTGCCCAGGGCGCTCG
		In1		F: GGCATCCAAGCAGCAAG	VR			55 °C for 30 s
				R: AAGCAGACTTGACCTGA
		In2		F: CGGGATCCCGGACGGCATGCACGATTTGTA	VR			56 °C for 30 s
				R: GATGCCATCGCAAGTACGAG
Plasmid replicon typing		HI1		F: GGAGCGATGGATTACTTCAGTAC	471			60 °C for 30 s
				R: TGCCGTTTCACCTCGTGAGTA
		HI2		F: TTTCTCCTGAGTCACCTGTTAACAC	644			60 °C for 30 s
				R: GGCTCACTACCGTTGTCATCCT
		I1		F: CGAAAGCCGGACGGCAGAA	139			60 °C for 30 s
				R: TCGTCGTTCCGCCAAGTTCGT
		X		F: AACCTTAGAGGCTATTTAAGTTGCTGAT	376			60 °C for 30 s
				R: TGAGAGTCAATTTTTATCTCATGTTTTAGC
		L/M		F: GGATGAAAACTATCAGCATCTGAAG	785			60 °C for 30 s
				R: CTGCAGGGGCGATTCTTTAGG
		N		F: GTCTAACGAGCTTACCGAAG	559			60 °C for 30 s
				R: GTTTCAACTCTGCCAAGTTC
		FIA		F: CCATGCTGGTTCTAGAGAAGGTG	462			60 °C for 30 s
				R: GTATATCCTTACTGGCTTCCGCAG
		FIB		F: GGAGTTCTGACACACGATTTTCTG	702			60 °C for 30 s
				R: CTCCCGTCGCTTCAGGGCATT
		W		F: CCTAAGAACAACAAAGCCCCCG	242			60 °C for 30 s
				R: GGTGCGCGGCATAGAACCGT
		Y		F: AATTCAAACAACACTGTGCAGCCTG	765			60 °C for 30 s
				R: GCGAGAATGGACGATTACAAAACTTT
		P		F: CTATGGCCCTGCAAACGCGCCAGAAA	534			60 °C for 30 s
				R: TCACGCGCCAGGGCGCAGCC
		FIC		F: GTGAACTGGCAGATGAGGAAGG	262			60 °C for 30 s
				R: TTCTCCTCGTCGCCAAACTAGAT
		A/C		F: GAGAACCAAAGACAAAGACCTGGA	465			60 °C for 30 s
				R: ACGACAAACCTGAATTGCCTCCTT
		T		F: TTGGCCTGTTTGTGCCTAAACCAT	750			60 °C for 30 s
				R: CGTTGATTACACTTAGCTTTGGAC
		FII		F: CTGTCGTAAGCTGATGGC	270			60 °C for 30 s
				R: CTCTGCCACAAACTTCAGC
		FrepB		F: TGATCGTTTAAGGAATTTTG	270			52 °C for 30 s
				R: GAAGATCAGTCACACCATCC
		K/B		F: GCGGTCCGGAAAGCCAGAAAAC
		K		R: TCTTTCACGAGCCCGCCAAA	160			60 °C for 30 s
		B/O		R: TCTGCGTTCCGCCAAGTTCGA	159			60 °C for 30 s
Phylogenetic grouping		chuA		F: GACGAACCAACGGTCAGGAT	279			59 °C for 30 s
				R: TGCCGCCAGTACCAAAGACA
		yjaA		F: TGAAGTGTCAGGAGACGCTG	211			59 °C for 30 s
				R: ATGGAGAATGCGTTCCTCAAC
		TspE4.C2		F: GAGTAATGTCGGGGCATTCA	152			59 °C for 30 s
				R: CGCGCCAACAAAGTATTACG
Multilocus sequence typing		adk		F: TCATCATCTGCACTTTCCGC	583			54 °C for 30 s
				R: CCAGATCAGCGCGAACTTCA
		fume		F: TCACAGGTCGCCAGCGCTTC	806			54 °C for 30 s
				R: GTACGCAGCGAAAAAGATTC
		gyrB		F: TCGGCGACACGCATGACGGC	911			60 °C for 30 s
				R: ATCAGGCCTTCACGCGCATC
		icd		F: ATGGAAAGTAAAGTAGTTGTTCCGGCACA	878			54 °C for 30 s
				R: GGACGCAGCAGGATCTGTT
		mdh		F: ATGAAAGTCGCAGTCCTCGGCGCTGCTGGCGG	932			60 °C for 30 s
				R: TTAACGAACTCCTGCCCCAGAGCGATATCTTTCTT
		purA		F: TCGGTAACGGTGTTGTGCTG	816			54 °C for 30 s
				R: CATACGGTAAGCCACGCAGA
		recA		F: CGCATTCGCTTTACCCTGACC	780			58 °C for 30 s
				R: TCGTCGAAATCTACGGACCGGA
